# Supplementary material for: Summer Precipitation Forecast Using an Optimized Artificial Neural Network with a Genetic Algorithm for Yangtze-Huaihe River Basin, China
Source: MDPI journal article supplement (doi:10.3390/atmos13060929), 2022-06-07
Supplement: s1 [file s1]

Archive with 1 entries (1 files):
- atmosphere-1719224-supplementary.pdf
